# Supplementary material
Source: PubMed Central journal article supplement (PMC8739414)
Supplement: 11606_2021_6791_MOESM1_ESM.pdf [file 11606_2021_6791_MOESM1_ESM.pdf]

## Appendix 1—Gender health program intake elements

1. Last name, First name, Middle name
2. Preferred name
3. Documentation name
4. Date of name change
5. Birth date
6. Gender pronouns
  - a. Feminine pronouns (e.g. she/her/hers)
  - b. Masculine pronouns (e.g. he/him/his)
  - c. Neutral pronouns (e.g. they/them/theirs)
  - d. No pronouns
  - e. Other
7. Sexual orientation
  - a. Lesbian
  - b. Gay
  - c. Straight
  - d. Queer
  - e. Bisexual
  - f. Other
  - g. Choose not to disclose
8. Gender identity
  - a. Female
  - b. Male
  - c. Transgender female
  - d. Transgender male
  - e. Genderqueer
  - f. Gender non-binary
  - g. Gender fluid
  - h. Other
9. Assigned/documented sex at birth
  - a. Female
  - b. Male
  - c. Intersex/DSD
10. Insurance type
  - a. PPO
  - b. HMO
  - c. Medi-Cal
  - d. Medicare
  - e. No insurance
11. Insurance status
  - a. Active
  - b. Inactive
12. Initial patient contact date
13. Initial Gender Health Program contact date
14. Phone number

15. Race
  - a. American Indian/Alaska Native
  - b. Asian/Asian American
  - c. Black/African American
  - d. Native Hawaiian/Pacific Islander
  - e. White
  - f. Other
16. Ethnicity: Hispanic or Latino Origins
  - a. Yes
  - b. No
17. Need language translation?
  - a. Yes
  - b. No
18. If yes, what language?
19. Documentation gender markers
  - a. Female
  - b. Male
  - c. Gender non-binary
20. Patient's goal/interest
  - a. Establish primary care
  - b. Hormone management
  - c. Referral for surgical services
  - d. Referral for fertility services
  - e. Referral for other health concerns
  - f. Behavioral health services
  - g. Other
21. If referral for surgical services selected:
  - a. Vaginoplasty with or without canal
  - b. Metoidioplasty
  - c. Phalloplasty
  - d. Scrotoplasty
  - e. Breast augmentation
  - f. Chest reconstruction
  - g. Facial reconstruction
  - h. Hysterectomy
  - i. Vocal surgery
  - j. Tracheal shave
  - k. Orchiectomy
  - l. Other
22. Primary care provider
  - a. Yes
  - b. No
23. Name of primary care provider

### **Transition history**

24. When was your social transition?

25. In need of social support resources

- a. Yes
- b. No

26. Surgical transition- underwent:

- a. None
- b. Breast augmentation
- c. Orchiectomy
- d. Vaginoplasty
- e. Clitoral/labial reconstruction
- f. Facial feminization
- g. Tracheal shave
- h. Bilateral complete mastectomy
- i. Hysterectomy w/ oophorectomy
- j. Phalloplasty
- k. Urethroplasty
- l. Voice surgery
- m. Metoidioplasty
- n. Chest reconstruction
- o. Vaginectomy
- p. Scrotoplasty
- q. Other

27. Surgical transition- planned/scheduled

- a. None
- b. Breast augmentation
- c. Orchiectomy
- d. Vaginoplasty
- e. Clitoral/labial reconstruction
- f. Facial feminization
- g. Tracheal shave
- h. Bilateral complete mastectomy
- i. Hysterectomy w/ oophorectomy
- j. Phalloplasty
- k. Urethroplasty
- l. Voice surgery
- m. Metoidioplasty
- n. Chest reconstruction
- o. Vaginectomy
- p. Scrotoplasty
- q. Other

28. Would like referral for:

- a. None
- b. Breast augmentation
- c. Orchiectomy
- d. Vaginoplasty
- e. Clitoral/labial reconstruction
- f. Facial feminization

- g. Tracheal shave
  - h. Bilateral complete mastectomy
  - i. Hysterectomy w/ oophorectomy
  - j. Phalloplasty
  - k. Urethroplasty
  - l. Voice surgery
  - m. Metoidioplasty
  - n. Chest reconstruction
  - o. Vaginectomy
  - p. Scrotoplasty
  - q. Other
29. Prior psychiatric diagnoses
- a. ADHD
  - b. Anxiety
  - c. Autism spectrum disorder
  - d. Asperger syndrome
  - e. Bipolar
  - f. Depression
  - g. Eating disorder
  - h. Gender dysphoria
  - i. PTSD/Trauma
  - j. Substance use disorder
  - k. Other
30. Prior psychiatric hospitalization
- a. Yes
  - b. No
31. Prior behavioral health treatment
- a. Yes
  - b. No
32. Current behavioral health treatment
- a. Yes
  - b. No
33. Reproductive life planning- Goals
- a. Yes
  - b. No
34. Fertility preservation undergone
- a. Yes
  - b. No
35. Fertility preservation desired
- a. Yes
  - b. No
36. Chronic medical illnesses/specialist referrals may be needed
- a. Yes
  - b. No
